# Supplementary material
Source: ML conference proceedings conference paper supplement (https://proceedings.neurips.cc/paper_files/paper/2022/hash/3f45a1768ed452c1706e0a3a272e3bbc-Abstract.html)
Supplement: Supplementary file 1 [file 3f45a1768ed452c1706e0a3a272e3bbc-Supplemental-Conference.zip]

Archive with 6 entries (5 files):
- 12915_simple_and_optimal_greedy_onli-Supplementary Material/
- __MACOSX/._12915_simple_and_optimal_greedy_onli-Supplementary Material
- 12915_simple_and_optimal_greedy_onli-Supplementary Material/greedy_ocrs.py
- __MACOSX/12915_simple_and_optimal_greedy_onli-Supplementary Material/._greedy_ocrs.py
- 12915_simple_and_optimal_greedy_onli-Supplementary Material/Appendix.pdf
- __MACOSX/12915_simple_and_optimal_greedy_onli-Supplementary Material/._Appendix.pdf
